# Supplementary material for: A TRP Family Based Signature for Prognosis Prediction in Head and Neck Squamous Cell Carcinoma
Source: Hindawi journal article supplement (doi:10.1155/2022/8757656), 2022-01-31
Supplement: f1 [file 8757656.f1.pdf]

Supplementary Table S1 The list of 28 TRP family genes.

| Gene Name | Symbol ID |
|-----------|-----------|
| TRPM1     | TRPM1     |
| TRPM2     | TRPM2     |
| TRPM3     | TRPM3     |
| TRPM4     | TRPM4     |
| TRPM5     | TRPM5     |
| TRPM6     | TRPM6     |
| TRPM7     | TRPM7     |
| TRPM8     | TRPM8     |
| TRPC1     | TRPC1     |
| TRPC2     | TRPC2     |
| TRPC3     | TRPC3     |
| TRPC4     | TRPC4     |
| TRPC5     | TRPC5     |
| TRPC6     | TRPC6     |
| TRPC7     | TRPC7     |
| TRPV1     | TRPV1     |
| TRPV2     | TRPV2     |
| TRPV3     | TRPV3     |
| TRPV4     | TRPV4     |
| TRPV5     | TRPV5     |
| TRPV6     | TRPV6     |
| TRPA1     | TRPA1     |
| TRPP2     | PKD2      |
| TRPP3     | PKD2L1    |
| TRPP5     | PKD2L2    |
| TRPML1    | MCOLN1    |
| TRPML2    | MCOLN2    |
| TRPML3    | MCOLN3    |
